# Supplementary material for: Randomized Clinical Trial of Computerized and Clinician-Delivered CBT in Comparison With Standard Outpatient Treatment for Substance Use Disorders: Primary Within-Treatment and Follow-Up Outcomes
Source: Atypon-hosted journal article supplement (doi:10.1176/appi.ajp.2018.17090978), 2018-05-24
Supplement: appi.ajp.2018.17090978.ds001.pdf [file appi.ajp.2018.17090978.ds001.pdf]

Data Supplement for Kiluk et al., Randomized Clinical Trial of Computerized and Clinician-Delivered CBT in Comparison With Standard Outpatient Treatment for Substance Use Disorders: Primary Within-Treatment and Follow-Up Outcomes. Am J Psychiatry (doi: 10.1176/appi.ajp.2018.17090978)

**TABLE S1. Psychotropic Medications by Condition**

| <b>Drug Name</b> | <b>Clinician CBT</b> | <b>Treatment as Usual</b> | <b>CBT4CBT+ monitoring</b> | <b>Total</b> |
|------------------|----------------------|---------------------------|----------------------------|--------------|
| Trazodone        | 2                    | 3                         | 5                          | 10           |
| Bupropion        | 1                    | 3                         | 1                          | 5            |
| Mirtazapine      | 2                    | 2                         | 1                          | 5            |
| Seroquel         | 3                    | 1                         | 1                          | 5            |
| Naltrexone       | 3                    | 1                         | 1                          | 5            |
| Lamictal         | 1                    | 1                         | 2                          | 4            |
| Citalopram       | 3                    | 1                         | 1                          | 5            |
| Fluoxetine       | 0                    | 1                         | 1                          | 2            |
| Divalproex       | 0                    | 3                         | 0                          | 3            |
| Duloxetine       | 1                    | 2                         | 0                          | 3            |
| Aripiprazole     | 0                    | 1                         | 0                          | 1            |
| Sertraline       | 1                    | 2                         | 1                          | 4            |
| Gabapentin       | 1                    | 1                         | 1                          | 3            |
| Lisinopril       | 2                    | 0                         | 1                          | 3            |
| Risperidone      | 1                    | 0                         | 1                          | 2            |
| Hydroxyzine      | 0                    | 2                         | 1                          | 3            |
| Thorazine        | 0                    | 0                         | 1                          | 1            |
| Escitalopram     | 0                    | 1                         | 0                          | 1            |
| Lithium          | 0                    | 1                         | 0                          | 1            |
| Ziprasidone      | 0                    | 1                         | 0                          | 1            |
| Metformin        | 0                    | 1                         | 1                          | 2            |
| Atomoxetine      | 0                    | 1                         | 0                          | 1            |
| Diazepam         | 1                    | 0                         | 0                          | 1            |
| Paroxetine       | 0                    | 0                         | 1                          | 1            |
| Hydrocodone      | 0                    | 1                         | 0                          | 1            |
| Amlodipine       | 1                    | 0                         | 2                          | 3            |
| Prazosin         | 1                    | 0                         | 1                          | 2            |
| Amitriptyline    | 1                    | 0                         | 1                          | 2            |

Yellow indicates antidepressants, blue indicates mood stabilizer or antipsychotic, orange indicates addiction medication. There were no significant differences by condition in the total number of participants taking any medication; nor by medication indication (e.g., antidepressant, mood stabilizer). Some medications may have been prescribed for non-FDA approved clinical uses (e.g., Gabapentin for the treatment of anxiety).
